# Supplementary material
Source: publisher figshare collection journal article supplement (https://karger.figshare.com/articles/dataset/_/5121391)
Supplement: Supplementary file 4 [file 1]

Archive with 3 entries (3 files):
- 000319909_sm_Figures.pdf
- 000319909_sm_Legends.pdf
- 000319909_sm_Suppl-Materials and Methods.pdf
