# Supplementary material
Source: publisher figshare collection journal article supplement (https://karger.figshare.com/articles/dataset/_/5121391)

# Supplemental Figures

## Figure S1

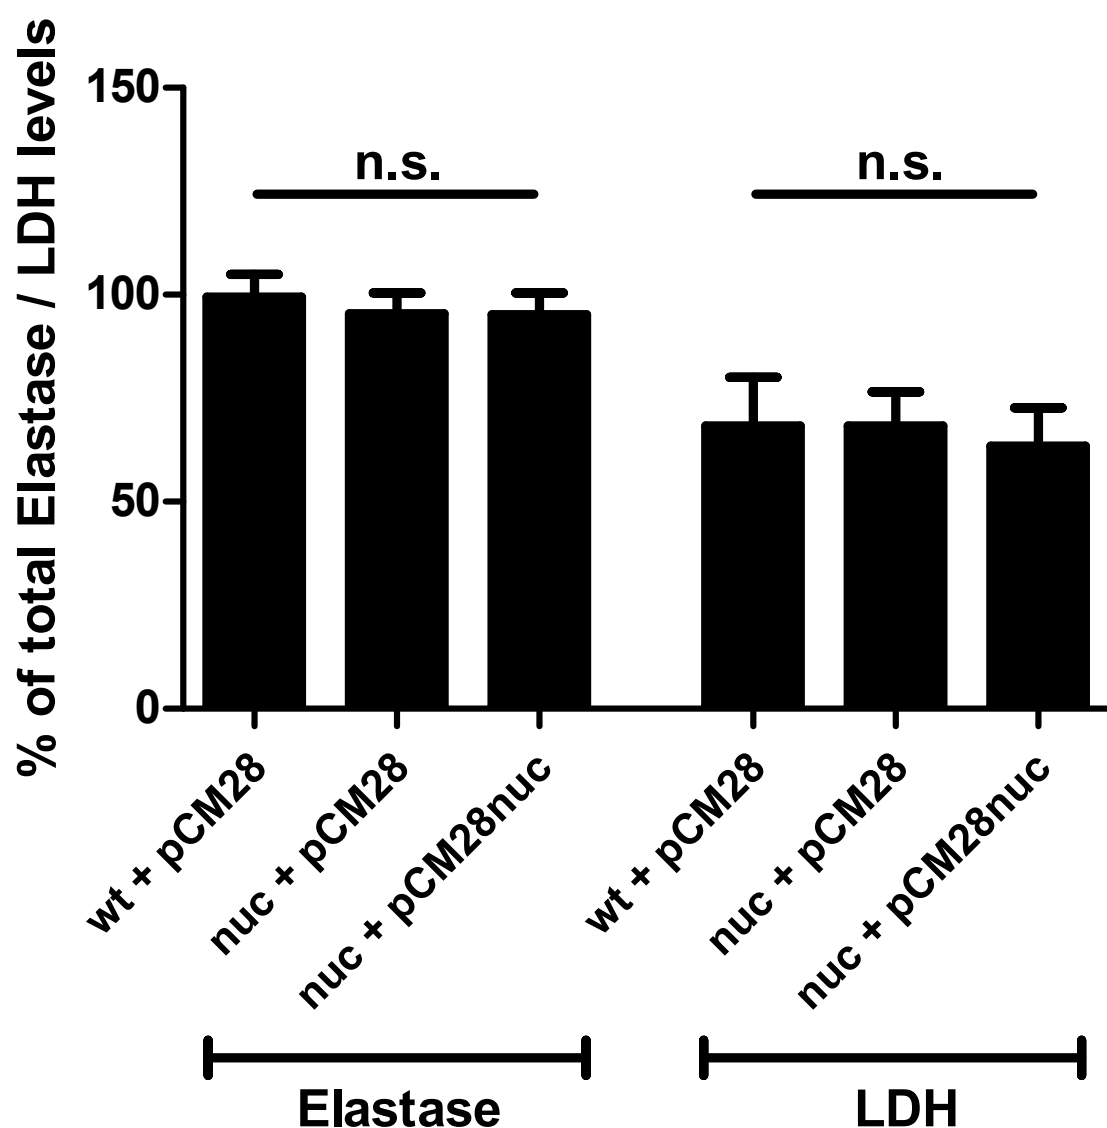

# Figure S2

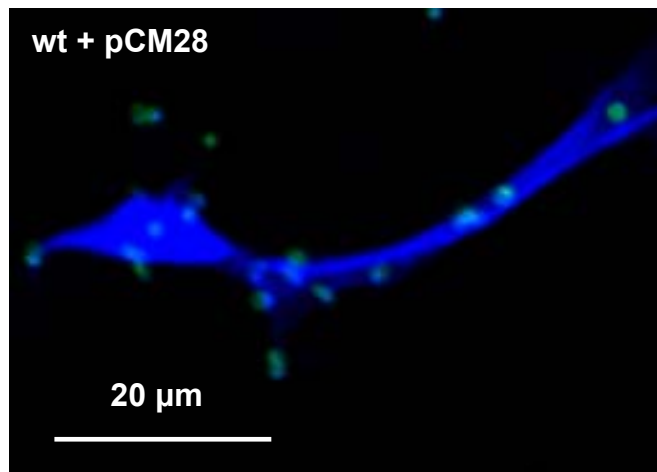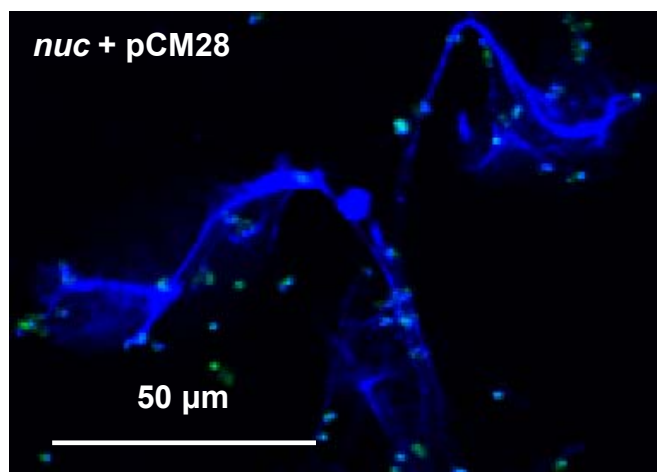

# Figure S3

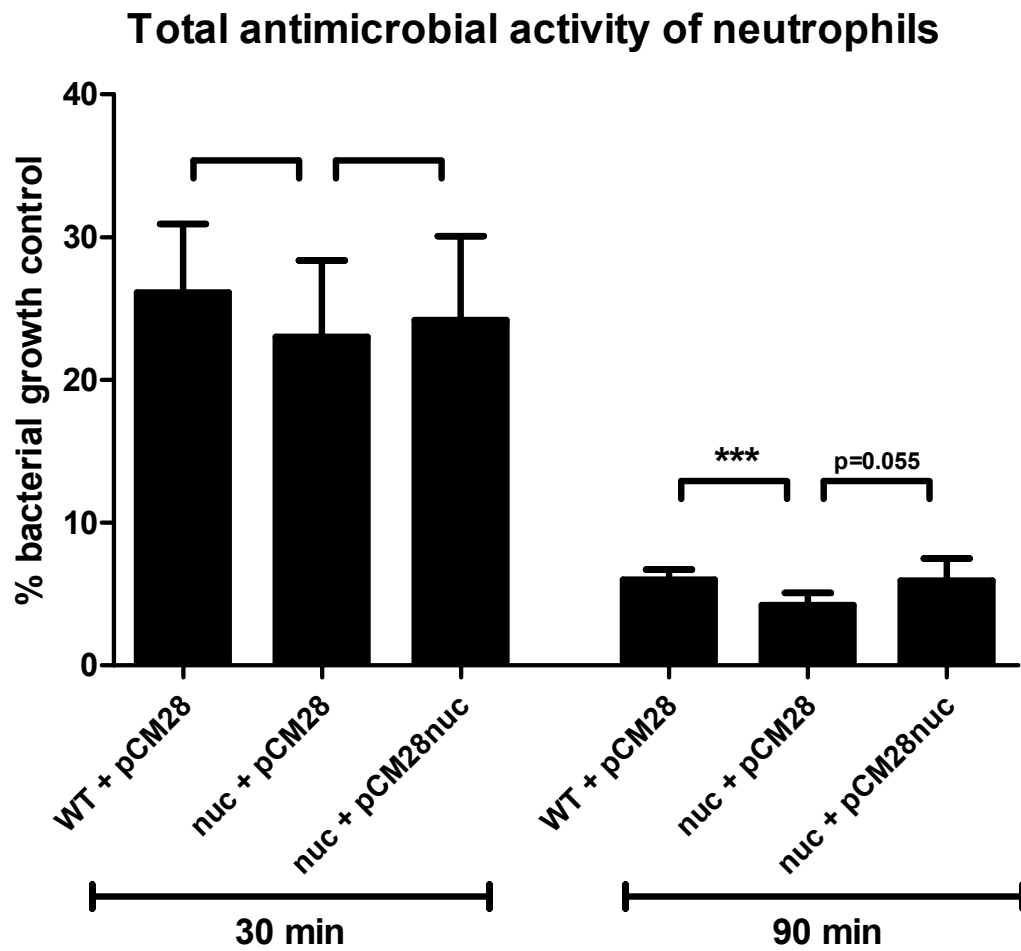

# Figure S4

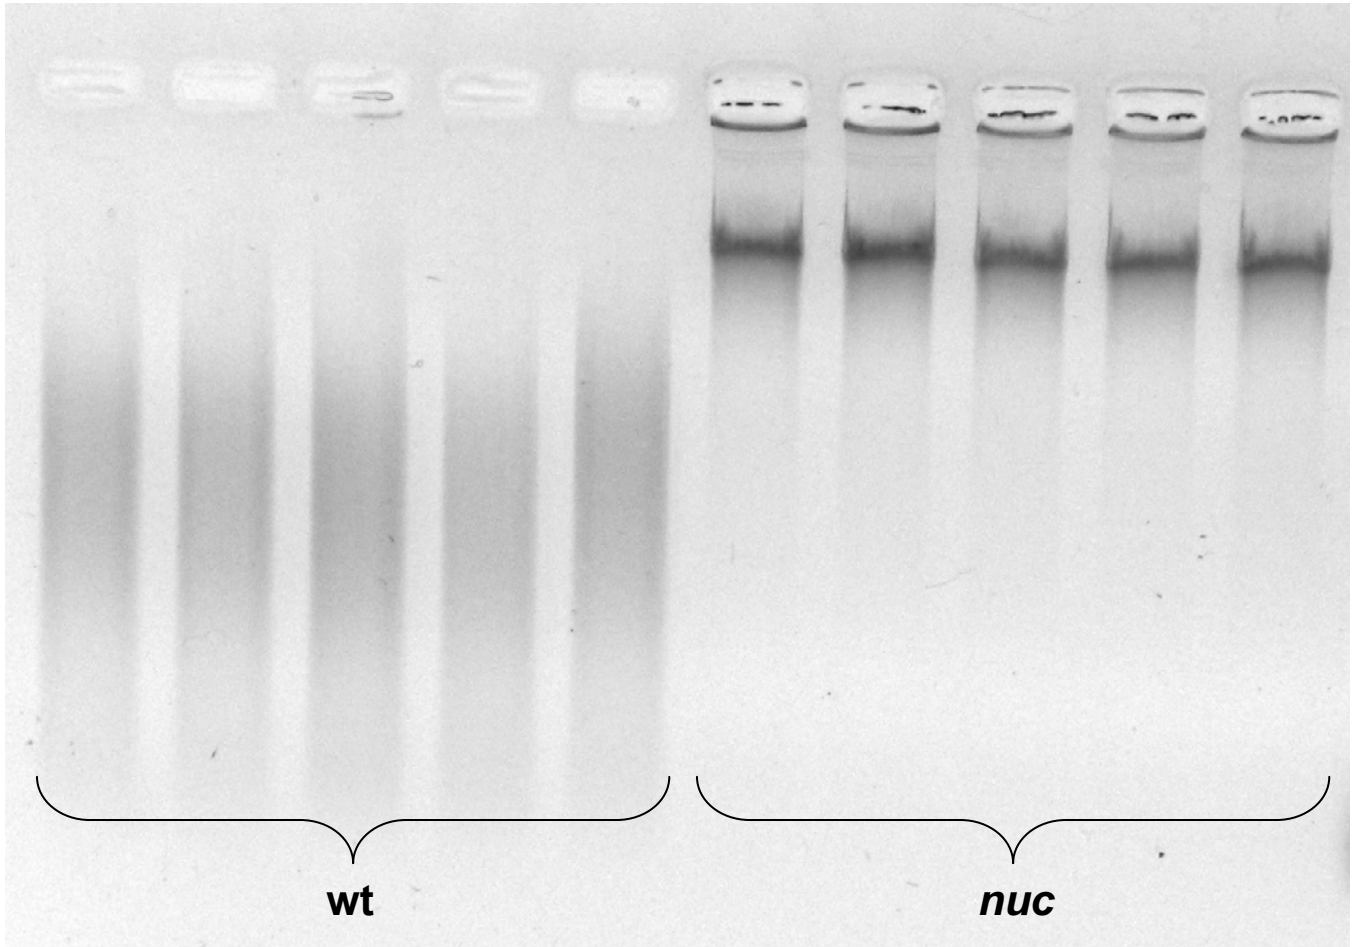

Supplement: Supplementary file 3 [file 1]
